# Supplementary material
Source: publisher site journal article supplement (https://www.dovepress.com/get_supplementary_file.php?f=492891.docx)
Supplement: Supplementary file 1 [file get_supplementary_file.php]

**Supplemental Table 1. Literature Search Strategy**

| PubMed (Filters: English, Humans) – search date 01/08/2025 | | |
| --- | --- | --- |
| Search | Query | Results |
| #13 | #3 AND #6 AND #9 AND #12 | 292 |
| #12 | #10 OR #11 | 366,425 |
| #11 | "Breast cancer"[tiab] | 278,968 |
| #10 | "Breast Neoplasms"[Mesh] | 322,268 |
| #9 | #7 OR #8 | 2,233,149 |
| #8 | "Prospective"[tiab] OR pre post study[tiab] OR pilot[tiab] | 755,730 |
| #7 | "Clinical Trial"[Publication Type] OR "Observational Study" [Publication Type] OR "Multicenter Study" [Publication Type] OR "Follow-Up Studies"[Mesh] | 1,749,369 |
| #6 | #4 OR #5 | 986,304 |
| #5 | "Musculoskeletal"[tiab] OR "Arthritis"[tiab] OR arthralg*[tiab] OR myalg*[tiab] OR tendinitis[tiab] OR tenosynovitis[tiab] OR "Diffuse pain"[tiab] OR polyarthralg*[tiab] OR "Widespread pain" [tiab] OR "Inflammatory pain"[tiab] OR "Nociplastic pain"[tiab] OR "Central sensitization"[tiab] | 227,717 |
| #4 | "Musculoskeletal Diseases"[Mesh] OR "Musculoskeletal Pain"[Mesh] | 917,560 |
| #3 | #1 OR #2 | 10,567 |
| #2 | "Anastrozole"[tiab] OR "Exemestane"[tiab] OR "Letrozole"[tiab] OR aromatase inhibitor* | 10,567 |
| #1 | “Aromatase Inhibitors”[MeSH] | 5,734 |
| CINAHL Ultimate — search date 01/08/2025 | | |
| Search | Query | Results |
|  | Limiter: English Language | 71 |
| S5 | S1 AND S2 AND S3 AND S4 | 71 |
| S4 | "clinical trial" OR "observational study" OR "multicenter study" OR "follow-up study" OR "prospective" OR "pre post study" OR "pilot study" | 783,601 |
| S3 | “breast cancer” OR “breast neoplasms” | 123,035 |
| S2 | musculoskeletal pain OR musculoskeletal OR arthritis OR arthralg* OR myalg* OR tendinitis OR tenosynovitis OR "diffuse pain" OR polyarthralg* OR "widespread pain" OR "inflammatory pain" OR "nociplastic pain" OR "central sensitization" | 136,274 |
| S1 | aromatase inhibitor* OR "anastrozole" OR "letrozole" OR "exemestane" | 4,224 |
| Ovid MEDLINE — search date 01/08/2025 | | |
| Search | Query | Results |
| #5 | #1 AND #2 AND #3 AND #4 | 172 |
| #4 | ("clinical trial" or "observational study" or "multicenter study" or "follow-up study" or "prospective" or "pre post study" or "pilot study").mp | 2,190,155 |
| #3 | ("breast cancer" or "breast neoplasms").mp | 472,992 |
| #2 | (musculoskeletal pain or musculoskeletal or arthritis or arthralg* or myalg* or tendinitis or tenosynovitis or "diffuse pain" or polyarthralg* or "widespread pain" or "inflammatory pain" or "nociplastic pain" or "central sensitization").mp | 397,607 |
| #1 | ("aromatase inhibitors" or "anastrozole" or "exemestane" or "letrozole").mp | 13,321 |
| EMBASE — search date 01/08/2025 | | |
| Search | Query | Results |
| #9 | Results Filter: EMBASE only (removing MEDLINE records) | 549 |
| #8 | #1 AND #2 AND #3 AND #4 AND [english]/lim AND [humans]/lim | 1,815 |
| #7 | #1 AND #2 AND #3 AND #4 AND [humans]/lim | 1,842 |
| #6 | #1 AND #2 AND #3 AND #4 AND [english]/lim | 1,845 |
| #5 | #1 AND #2 AND #3 AND #4 | 1,872 |
| #4 | "clinical trial" or "observational study" or "multicenter study" or "follow-up study" or "prospective" or "pre post study" or "pilot study" | 3,851,565 |
| #3 | "breast cancer" or "breast neoplasms" | 707,210 |
| #2 | musculoskeletal pain or musculoskeletal or arthritis or arthralg* or myalg* or tendinitis or tenosynovitis or "diffuse pain" or polyarthralg* or "widespread pain" or "inflammatory pain" or "nociplastic pain" or "central sensitization" | 923,954 |
| #1 | "aromatase inhibitors" or "anastrozole" or "exemestane" or "letrozole" | 44,163 |
| SCOPUS — search date 01/08/2025 | | |
| Search | Query | Results |
| #9 | #5 AND #6 AND #7 AND #8 | 1,387 |
| #8 | Filter: Keyword (Limit to) = Human or Humans | 2,522 |
| #7 | Filter: Language (Limit to) = English | 2,818 |
| #6 | Filter: Document type (Limit to) = Article OR Conference paper OR Letter OR Short survey | 1,577 |
| #5 | #1 AND #2 AND #3 AND #4 | 2,924 |
| #4 | "clinical trial" or "observational study" or "multicenter study" or "follow-up study" or "prospective" or "pre post study" or "pilot study" | 9,631,516 |
| #3 | "breast cancer" or "breast neoplasms" | 2,216,337 |
| #2 | musculoskeletal pain or musculoskeletal or arthritis or arthralg* or myalg* or tendinitis or tenosynovitis or "diffuse pain" or polyarthralg* or "widespread pain" or "inflammatory pain" or "nociplastic pain" or "central sensitization" | 743,148 |
| #1 | "aromatase inhibitors" or "anastrozole" or "exemestane" or "letrozole" | 85,278 |
| PsycINFO — search date 01/08/2025 | | |
| Search | Query | Results |
| #5 | #1 AND #2 AND #3 AND #4 | 10 |
| #4 | "clinical trial" or "observational study" or "multicenter study" or "follow-up study" or "prospective" or "pre post study" or "pilot study" | 162,565 |
| #3 | "breast cancer" or "breast neoplasms" | 17,029 |
| #2 | musculoskeletal pain or musculoskeletal or arthritis or arthralg* or myalg* or tendinitis or tenosynovitis or "diffuse pain" or polyarthralg* or "widespread pain" or "inflammatory pain" or "nociplastic pain" or "central sensitization" | 23,666 |
| #1 | "aromatase inhibitors" or "anastrozole" or "exemestane" or "letrozole" | 317 |
| ClinicalTrials.gov — search date 01/08/2025 | | |
| Search | Query | Results |
| #7 | (Aromatase Inhibitor Induced Musculoskeletal Syndrome \(AIMSS\) OR Aromatase Inhibitor Associated Musculoskeletal Symptoms \(AIMSS\)) OR ((Musculoskeletal Pain OR Arthritis OR Arthralgia OR Myalgia OR Tendinitis OR Tenosynovitis OR Polyarthritis OR Widespread Pain OR Nociplastic Pain OR (central sensitization OR central sensitisation)) AND (aromatase inhibitor OR aromatase inhibitors)) | 109 |
| #6 | (Musculoskeletal Pain OR Arthritis OR Arthralgia OR Myalgia OR Tendinitis OR Tenosynovitis OR Polyarthritis OR Widespread Pain OR Nociplastic Pain OR (central sensitization OR central sensitisation)) AND (aromatase inhibitor OR aromatase inhibitors) | 107 |
| #5 | Musculoskeletal Pain OR Arthritis OR Arthralgia OR Myalgia OR Tendinitis OR Tenosynovitis OR Polyarthritis OR Widespread Pain OR Nociplastic Pain OR (central sensitization OR central sensitisation) | 26,263 |
| #4 | Aromatase inhibitor OR aromatase inhibitors | 1,466 |
| #3 | Aromatase Inhibitor Induced Musculoskeletal Syndrome \(AIMSS\) OR Aromatase Inhibitor Associated Musculoskeletal Symptoms \(AIMSS\) | 13 |
| #2 | Aromatase Inhibitor Associated Musculoskeletal Symptoms \(AIMSS\) | 12 |
| #1 | Aromatase Inhibitor Induced Musculoskeletal Syndrome \(AIMSS\) | 1 |
| CENTRAL — search date 01/08/2025 | | |
| Search | Query | Results |
| #4 | #1 AND #2 AND #3 | 408 |
| #3 | "breast cancer" or "breast neoplasms" | 47,368 |
| #2 | musculoskeletal pain or musculoskeletal or arthritis or arthralg* or myalg* or tendinitis or tenosynovitis or "diffuse pain" or polyarthralg* or "widespread pain" or "inflammatory pain" or "nociplastic pain" or "central sensitization" | 64,686 |
| #1 | "aromatase inhibitors" or "anastrozole" or "exemestane" or "letrozole" | 5,102 |

**Supplemental Table 2. Inclusion/Exclusion Criteria and Definitions of AIMSS in the Included Studies of Pharmacological Interventions**

| **Author [Ref.]** | **Study type** | **Intervention type** | **Inclusion criteria** | **Exclusion criteria** | **Definition of AIMSS** |
| --- | --- | --- | --- | --- | --- |
| Alhanafy et al., 2018 | Pre/post | Other | - Postmenopausal  - Stage I-III HR(+) BrCA, receiving adjuvant AI | - Stage IV BrCA  - Pain due to trauma  - Liver dysfunction, impaired kidney function, clinically significant coagulopathy, hypotension, dehydration, concurrent diuretic use, contraindication to diuretics | - Developed new or worsening pain during adjuvant AI therapy  - Symmetrical joint pain, morning stiffness, improvement in joint discomfort with use or exercise, decreased grip strength |
| Birrell & Tilley, 2009 | RCT/PG | Endocrine or hormonal | - Postmenopausal (confirmed by FSH, LH, and estrogen levels)  - HR(+) positive BrCA  - On anastrozole 1 mg daily within 6 months of study entry  - Liver function enzymes (AST or ALT < 3x upper limit of normal | - Metastatic disease, liver disease, diabetes or glucose intolerance.  - Fragility, osteoporosis, osteopenia or low bone mineral density.  - On estrogen therapy or taking cyclosporine, anticoagulants, insulin, vitamin D supplementation (doses >4,000 IU/day), systemic. corticosteroids (taken >2 weeks), bisphosphonates. | - VAS pain or stiffness rating 40mm+ on 100 mm scale. |
| Briot et al., 2010 | Pre/post | Switching AI’s | - HR+ BrCA  - Treated with anastrozole  - Adequate hematopoietic and liver function | - Hypersensitive to letrozole.  - Metastatic disease.  - Bone fracture-related pain.  - On hormonal therapy other than anastrozole.  - Incapacitated or poor cognitive function. | - Experiencing lasting and severe musculoskeletal symptoms to the point of stopping anastrozole treatment. |
| Cathcart-Rake et al., 2021 | RCT/PG | Endocrine or hormonal | - Postmenopausal  - HR+ BrCA  - Treated with anastrozole or letrozole for 3+ weeks  - Non-concerning renal and liver function test results | - Residual or recurrent cancer.  - Glucose intolerance, coronary artery disease, or venous thromboembolism.  - Taking tamoxifen or exemestane, or on concurrent chemotherapy, radiation therapy, or other investigational drugs.  - On estrogen therapy, cyclosporine, anticoagulants, insulin, vitamin D supplementation (doses >4,000 IU/day), or systemic corticosteroids (taken >2 weeks). | - Rating of 5+ (out of 10) on 10-point scale, with pain believed by the patient to be caused by their AI. |
| Fleege et al., 2024 | Pre/post | Other | - Stage 0-III HR(+) BrCA. | - Unspecified. | - Worst joint pain 4+ on 10-point scale in the preceding 7 days that developed or worsened since starting AI treatment. |
| Henry et al., 2011 | Pre/post | Neuromodulatory | - Postmenopausal  - Stage I-III HR(+) BrCA.  - On standard dose AI therapy for at least 2 weeks. | - Pain due to trauma or fracture.  - History of liver dysfunction, clinically significant coagulopathy, narrow angle glaucoma, seizure disorder, schizophrenia, psychosis, suicidal ideation, substance use disorder in the year before enrollment  - Use of a monoamine oxidase inhibitor within 14 days of enrollment.  - Creatinine clearance < 30 mL/min. | - Musculoskeletal pain or sensory neuropathy that developed or worsened during AI therapy, with average pain during the week before enrollment rated 4+ on a 0-10-point scale. |
| Henry et al., 2018 | RCT/PG | Neuromodulatory | - Postmenopausal.  - Stage I-III HR(+) BrCA.  - Completed all indicated surgeries, chemotherapy, and radiation therapy at least 28 days before study entry.  - Taking an AI at standard dose for 21+ days, initiated within 36 months of study entry. | - Concurrent treatment with an antidepressant; allergy to duloxetine; prior treatment with duloxetine, venlafaxine, or milnacipran.  - Musculoskeletal pain due to fracture of traumatic injury.  - Inflammatory arthritis, osteoarthritis, or cancer involving the bone.  - History of chronic liver disease, end stage kidney disease, uncontrolled narrow-angle glaucoma, or clinically significant coagulation disorder.  - Antidepressant required for depression.  - History of primary psychotic illness, suicidal ideation, history of bipolar spectrum disorder, history of seizure disorder, or alcohol or other substance abuse/dependence within 12 months prior to study entry.  - Use of a monoamine oxidase inhibitor within 14 days of study entry or concomitant therapy with heparin or warfarin. | - BPI average joint pain score 4+ on a 10-point scale within 7 days of study entry. |
| Kadakia et al., 2017 | Otherb | Switching AI’s | - Postmenopausalb.  - Stage 0-III HR(+) BrCAb.  - Initiated treatment with an initial AI but needed to switch to alternative protocol-administered AI due to intolerance.  - All indicated surgery, chemotherapy, and/or radiation therapy completed prior to study entryb.  - No prior AI therapyb. | - Unspecified. | - Not applicable. |
| Kubo et al., 2012 | Pre/post | Analgesic/anti-inflammatory | - Primary BrCA who “suffered from AI-induced arthralgia.”  - On anastrozole or letrozole. | - None specified. | - Only mentions that enrollees “suffered from AI-induced arthralgia.” |
| Li et al., 2014 | RCT/PG | Endocrine or hormonal | - Postmenopausal.  - ER(+) BrCA.  - Undergoing adjuvant AI therapy. | - Unspecified. | - Patients reporting anastrozole-induced bone pain. |
| Martinez et al., 2022 | NRT/PG | Analgesic/anti-inflammatory | - Postmenopausal.  - < 75 years of age.  - “Early stage” HR(+) BrCA.  - On AI therapy  - Adequate renal function, normal/controlled blood pressure, no contraindication to NSAID usec | - Unspecified. | - No pre-specified baseline arthralgia, pain, or stiffness level was required. |
| Zhang et al., 2010 | Pre/post | Other | - Stage I-III HR(+) BrCA  - On AI therapy | - History of inflammatory, metabolic, or neuropathic arthropathies, bone fracture or surgery of affected extremity in the preceding 6 months.  - Currently taking oral or injected steroids or narcotic medications. | - Presence of “joint symptoms related to AIs” assessed via a series of three questions designed to establish the presence of arthralgias and onset or worsening of arthralgias after initiating AI therapy. |
| Zylla et al., 2024 | RCT/PG | Other | - Stage I-III BrCA | - Current skin lesions, any use of cannabis in the preceding 4 weeks, current acupuncture treatments, plans to increase the dose(s) of other analgesics. | - Score of 4+ on at least one screening M-SACRAH questions. |
| Key: AI = aromatase inhibitor; AIMSS = aromatase inhibitor-induced musculoskeletal syndrome; BPI = Brief Pain Inventory; BPI-SF = Brief Pain Inventory, Short Form; BrCA = breast cancer; COX-2 = cyclo-oxygenase-2; ER = estrogen receptor; FSH = follicle stimulating hormone; HAQ-II = Health Assessment Questionnaire-II; HR(+) = hormone receptor-positive; HgbA1c = glycosylated hemoglobin (hemoglobin A1c); LH = luteinizing hormone; NSAID = non-steroidal anti-inflammatory medication; PR = progesterone receptor  a Report was published only in abstract form. b Refers to the original entry criteria for the original prospective study. In original trial, subjects were randomized to letrozole or exemestane. An amendment to the protocol allowed patients who were intolerant of their first AI to switch to the other study-provided AI. After a 2-8 week washout, patients started treatment on the second AI until discontinuation for any reason during follow-up. c Additional inclusion criteria applied only to those assigned to NSAID therapy. | | | | | |

**Supplemental Table 3. Inclusion/Exclusion Criteria and Definitions of AIMSS in the Included Studies of Complementary/Alternative Interventions**

| **Author [Ref.]** | **Study type** | **Intervention type** | **Inclusion criteria** | **Exclusion criteria** | **Definition of AIMSS** |
| --- | --- | --- | --- | --- | --- |
| Arul Vijaya Vani et al., 2016 | Pre/post | Nutrition/suppl. | - Postmenopausal  - ER+ breast cancer  - Receiving letrozole for more than 2 months | - Bone metastases.  - History of renal stones.  - Serum calcium > 11 mg/L.  - Renal failure.  - Taking steroid hormone replacement. | - HAQ-II was used to assess musculo-skeletal symptoms but qualifying cutoff score was not specified. |
| Bahcaci et al., 2024 | RCT/PG | Physiol./psycho-physiol | - Postmenopausal.  - Stage I-III HR(+) BrCA.  - Receiving AI’s for more than 6 months | - Communication disorders  - Neurological or orthopedic conditions preventing exercise  - Recent surgery.  - Any physical training within the 6 months preceding study entry.  - Diagnosed lymphedema. | “Prevalent” side-effects in subjects taking AI’s. |
| Bao et al., 2012, 2013, 2014 | RCT/PG | Physiol./psycho-physiol. | - Postmenopausal  - Stage 0-III ER+ and/or PR+ BrCA  - Third generation AI taken for at least 1 month | - Acupuncture treatment received in the 12 months preceding study entry. | - Physician-documented AIMSS.  - Baseline HAQ-DI score > 0.3 and/or pain rating > 20 on a 100-point VAS. |
| Barzaghi et al., 2015 | Pre/post | Physiol./psycho-physiol. | - Postmenopausal  - Early BrCA | Exclusion criteria not specified. | - Experiencing arthralgias attributable to AI’s. |
| Campbell et al., 2017 | Pre/post | Nutrition/suppl. | - Postmenopausal  - Stage I-III HR+ BrCA  - Takine AI therapy for 14+ days preceding study entry | Exclusion criteria not specified. | - Musculoskeletal pain symptoms associated with the AI’s.  - Average pain level of 4+ on a scale from 0-10 using the BPI-SF. |
| Chan et al., 2017 | RCT/PG | Other | - Postmenopausal  - Stage I-III BrCA  - Treated with AI for a minimum of 3 months and planning to continue the same AI for at least 6 more months | - Rheumatoid or other connective tissue disorder associated with joint pain.  - Prior joint surgery (could not be included as an evaluable joint).  - Taking oral corticosteroids or immunosuppressant medications.  - Allergy to oleic or linolenic acid. | - Self-reported new or increased severity of joint pain following AI initiation in up to three evaluable joints. |
| Cheng et al., 2023a | RCT/PG | Physiol./psycho-physiol. | - Breast cancer survivor receiving AIs | Exclusion criteria not specified. | - Experiencing joint pain, fatigue, and sleep disturbances. |
| Crew et al., 2007 | RCT/CO | Physiol./psycho-physiol. | - Postmenopausal  - Stage I-IIIA HR(+) BrCA  - Currently taking a 3rd generation AI for at least 6 months | - Previously received acupuncture for AI induced joint symptoms or received any acupuncture within 6 months prior to study entry.  - History of inflammatory, metabolic, or neuropathic arthropathies, bone fracture or surgery of an affected extremity during the preceding 6 months.  - Currently taking corticosteroids (oral or injected) or narcotics.  - Metastatic disease, history of severe coagulopathy or bleeding disorder, or dermatologic disease within the acupuncture area. | - Persisting pain and/or stiffness in at least one joint that started or worsened after initiation of AI therapy.  - Baseline BPI-SF worst pain score of 3+ on a 0 to 10-point scale. |
| Crew et al., 2010 | RCT/PG | Physiol./psycho-physiol. | - Postmenopausal  - Stage I-III HR(+) BrCA  - Currently taking a 3rd generation AI for at least 3 months | - Previously received acupuncture for AI induced joint symptoms or any acupuncture within 6 months prior to study entry.  - History of inflammatory, metabolic, or neuropathic arthropathies, bone fracture/surgery of an afflicted extremity during the preceding 6 months.  - Current use of corticosteroids or narcotics.  - History of severe coagulopathy. | - Persisting pain and/or stiffness in at least one joint that started or worsened after initiation of AI therapy  - Baseline BPI-SF worst pain score over the past week of 3+ on a 0 to 10-point scale. |
| Desideri et al., 2022 | Pre/post | Nutrition/suppl. | - Postmenopausal  - ER(+) early BrCA | - History of rheumatological or endocrinologic diseases, renal insufficiency, joint trauma, osteoarthropathy, avascular necrosis, gout, systemic lupus erythematosus, septic arthritis.  - Grade 3 or higher arthralgias before the start of AIs. | - Arthralgias during adjuvant AI therapy. |
| Galantino et al., 2012a, 2012b | Pre/post | Physiol./psycho-physiol. | - Stage I-III BrCA.  - Currently receiving AIs. | - Metastatic disease.  - History of joint pain due to inflammatory arthritis or noninflammatory arthralgia prior to AI initiation.  - Surgery or joint injection involving the treatment joint within 3 months preceding enrollment. | - Joint pain attributable to AI medication.  - Worst joint pain 3+ on a 10-point scale. |
| Galantino et al., 2013 | Pre/post | Physiol./psycho-physiol. | - Postmenopausal.  - Stage I-III BrCA.  - Receiving AI therapy. | - Metastatic disease.  - Completed chemotherapy or radiation less than 4 weeks prior to enrollment.  - History of joint pain secondary to inflammatory arthritis or noninflammatory arthralgia prior to AI initiation.  - Surgery or a joint injection involving the treatment joint within 3 months predecing enrollment. | - Joint pain attributable to AI therapy for at least 3 months. |
| Gomaa et al., 2022 | Pre/post | Physiol./psycho-physiol. | - Postmenopausal.  - Stage 0-III BrCA.  - Receiving AI therapy for at least 2 months. | - Having another type of cancer that was diagnosed with in the past 5 years.  - Having uncontrolled cardiac, pulmonary, or infectious disease  - Body mass index >40 kg/m2.  - Currently attending any mind-body therapy class such as tai chi or yoga.  - Having joint pain due to an inflammatory arthritis.  - Having surgery within the past 6 months or joint injection within the past 3 months.  - Currently taking corticosteroids or opioids. | - Joint pain that started or worsened after the initiation of AI’s.  - Worst pain score in the prior week of 4+ on a 0-10 point scale. |
| Greenlee et al., 2013 | Pre/post | Nutrition/suppl. | - Postmenopausal  - Stage I-III BrCA  - Currently taking a 3rd-generation AI for 3 or more months.  - If taking bisphosphonates, on a stable dose for at least 3 months.  - HgbA1c < 8% within the past 12 months. | - Metastatic disease.  - Glucosamine or chondroitin taken within the past 3 months.  - Current use of medications other than acetaminophen and ibuprofen for joint pain.  - Concurrent medical/arthritic disease that could confound or interfere with evaluation of joint pain or efficacy.  - History of significant joint, ligament, or bone disease and/or injury in the 6 months prior to study entry.  - Allergy to shellfish | - Score of 4+ on a 10-point scale assessing worst joint pain/stiffness in the past 7 days, that started or increased since initiating AI therapy and has been present for 3 or more months. |
| Hershman et al., 2022 | RCT/PG | Physiol./psycho-physiol. | - Postmenopausal.  - Stage I-III HR(+) BrCA.  - Taking AI’s for at least 30 days before study entry | - Metastatic disease.  - Prior acupuncture treatment within 12 months of study entry.  - Severe bleeding disorder or other disqualifying general medical disease, history of bone fracture, or history of surgery of afflicted extremities within the 6 months preceding study entry.  - Recent use of topical analgesics, narcotics or corticosteroids. | - Score of 3+ on BPI worst pain item. |
| Hershman et al., 2014 | RCT/PG | Nutrition/suppl. | - “Early stage” BrCA.  - Taking AI’s for at least 90 days preceding study entry. | Exclusion criteria not specified. | - BPI worse pain/stiffness score > 5. |
| Hershman et al., 2015 | RCT/PG | Nutrition/suppl. | - Postmenopausal.  - Stage I-III HR(+) BrCA.  - Taking AI’s for at least 90 days preceding study entry. | - History of omega-3 fatty acid supplements in the 3 months prior to study entry.  - History of facture or surgery involving the affected joint within 6 months preceding study entry.  - Oral narcotics or topical analgesics in 14 days prior to study entry.  - Oral steroids or intra-articular steroid injections within 28 days of study entry. | - BPI-SF worst pain score >3 with patients’ self-report of pain starting or increasing since starting AI therapy. |
| Hershman et al., 2018, 2021 | RCT/PG | Physiol/psycho-physiol. | - Postmenopausal.  - Stage I-IIIB ER(+) BrCA.  - Taking 3rd generation AI for at least 30 days preceding study entry. | - Prior acupuncture treatment for joint symptoms.  - Treatment with opioids, topical analgesics, oral corticosteroids, intramuscular corticosteroids, intra-articular steroids, or any other treatment for joint pain or stillness within 28 days of study entry.  - History of bone fracture or surgery of affected joints within 6 months of study entry.  - Severe bleeding disorder or latex allergy. | - Score >3 on BPI-SF worst pain score in patients self-reporting pain starting or increasing since starting AI therapy. |
| Jacobsen et al., 2016 | Pre/post | Physiol/psycho-physiol. | - Postmenopausal.  - Stage 0-III BrCA.  - On AI therapy. | - Another form of cancer diagnosed in past 5 years.  - Uncontrolled cardiac, pulmonary, or infecious disease.  - BMI > 40 kg/m2  - Currently attending yoga classes.  - Joint pain due to inflammatory arthritic conditions.  - Surgery within the 3 months preceding study entry.  - Currently taking corticosteroids or opioids. | - Self-reported joint pain that started or worsened after AI initiation.  - Worst pain in past week rated as 4+ on 0-10-point scale. |
| Kiyomi et al., 2015 | Pre/post | Nutrition/suppl. | - Postmenopausal.  - Women with BrCA receiving adjuvant AI. | - Pre-existing chronic rheumatism, osteoarthritis, shoulder periarthritis, or severe osteoporosis.  - History of mental disorder.  - Previous vitamin E supplementation.  - Taking anticoagulants  - History of surgery other than breast cancer resection. | - Complaining of arthralgia (moderate pain) interfering with function after starting AI therapy. |
| Leibel et al., 2022 | Pre/post | Physiol/psycho-physiol. | - BrCA patients undergoing AI treatment. | Exclusion criteria not specified. | - Self-reported arthralgias. |
| Li et al., 2017 | RCT/PG | Traditional | - Postmenopausal.  - Stage 0-IIIB BrCA.  - Taking anastrozole, exemesatane, or letrozole for <1 month preceding study entry. | - Diagnosed primary osteoarticular disease or diseases influencing bone metabolism.  - Presence of other types of cancer.  - Severe heart, kidney, liver, and hematological diseases.  - Use of medications influencing bone metabolism.  - Contraindicatoins to vitamin D or calcium supplements. | - Recent symptoms of joint pain. |
| Mao et al., 2009 | Pre/post | Physiol/psycho-physiol. | - Postmenopausal.  - Stage I-III BrCA.  - Currently receiving AI’s. | - Metastatic disease.  - Finished chemotherapy or radiation therapy less than 4 weeks prior to study entry.  - Received active intervention for pain, such as epidural injection, joint injection, acupuncture, and other treatments, in the 3 months preceding study entry.  - History of bleeding disorder. | - Joint pain attributable to AI’s with worst joint pain rated at least 4 on an 11-point (0-10) numerical rating scale. |
| Mao et al., 2014 | RCT/PG | Physiol/psycho-physiol. | - Stage I-III BrCA.  - Currently receiving AI’s. | - Metastatic disease.  - History of a bleeding disorder. | - Joint pain attributed to AI for at least 3 months.  - Worst pain rating of at least 4 on 0-10-point scale in the week preceding study entry.  - At least 15 days with pain in the 30 days preceding study entry. |
| Martinez et al., 2019 | Pre/post | Nutrition/suppl. | - Postmenopausal.  - Stage 0-IIIA BrCA.  - At least 6 months since last chemotherapy.  - On letrozole, anastrozole, exemestane, or tamoxifen at stable doses for >3 months.  - C-reactive protein >3.0 mg/L. | - Average aspirin dose >80 mg, ibuprofen > 800 mg, naproxen greater >500 mg, or any COX-2 inhibitors.  - History of autoimmune disease or inflammatory disorder.  - Systemic corticosteroid or bisphosphonate requirement. | - Pain scores assessed at baseline using BPI-SF but specific threshold for study entry was not specified. |
| Mao et al., 2021 & Bao et al., 2023 | RCT/PG | Physiol/psycho-physiol. | - Prior cancer diagnosis. | - History of inflammatory arthritis requiring disease-modifying drugs.  - Pending disability claim by self-report.  - Implanted electronically charged medical device. | - Musculoskeletal pain for at least 3 months and at least 15 of the 30 days preceding study entry.  - Worst pain intensity 4+ on 0–10-point scale. |
| Massimino et al., 2011a | RCT/CO | Traditional | - BrCA patients on AI’s. | Exclusion criteria not specified. | - Significant arthralgia on AI’s. |
| Nahleh et al., 2018a | Pre/post | Nutrition/suppl. | - Early stage BrCA on AI’s. | Exclusion criteria not specified. | - Experiencing pain at baseline. |
| Oh et al., 2013 | RCT/PG | Physiol/psycho-physiol. | - Postmenopausal.  - Stage I-III HR(+) BrCA.  - Taking AI’s for at least 6 months preceding study entry. | - Previous acupuncture for AIMSS or in general in the 6 months prior to study entry.  - History of inflammatory, metabolic or neuropathic arthropathies.  - History of bone fracture or surgery of an affected extremity during the previous 6 months.  - Currently taking oral or injected steroids or narcotics.  - Severe concomitant medical illness, coagulopathies, dermatologic disease within acupuncture area, cardiac pacing, implanted or topical electrical devices, or active infection.  - Needle phobia. | - Musculoskeletal pain symptoms and/or stiffness in at least one joint.  - Joint pain/stiffness started or worsened after initiation of AI treatment.  - BPI-SF worst pain score at least 3 (10-point scale). |
| Peng et al., 2018 | RCG/PG | Traditional | - Stage I-III BrCA.  - No recurrence or metastasis.  - Currently receiving anastrozole, letrozole, or exemestane for at least 3 months preceding study entry. | - History of endocrine or other diseases influencing bone metabolism in the 3 months preceding study entry.  - Contraindications to calcium or vitamin D supplements.  - History of primary osteoarticular disease (including rheumatoid arthritis or osteoarthritis).  - Other primary tumors or severe heart, liver, kidney, or hematological diseases.  - History of mental illness or neurocognitive disorder. | - Experiencing arthralgia, stiffness, or swelling in at least one joint that started or worsened after initiating AI therapy.  - BPI-SF worst pain score of at least 3 (on 10-point scale) over the past week. |
| Peppone et al., 2015 | USA | Physiol/psycho-physiol. | - Confirmed BrCA diagnosis, having undergone standard treatment.  - Sleep disturbance, as indicated by score of 3+ on 11-point scale.  - Receiving hormonal therapy. | - Diagnosis of sleep apnea.  - Metastatic cancer. | - Mentions only presence of musculoskeletal symptoms. |
| Rastelli et al., 2011 | RCT/PG | Nutrition/suppl. | - Postmenopausal.  - Stage I-IIIB HR(+) BrCA.  - On anastrozole for at least 8 weeks prior to study entry.  - Serum 25-OH vitamin D level 10-29 ng/mL, serum calcium concentration < 10.3 mg/dL, and 24-hour urine calcium excretion < 250 mg/g creatinine. | - Metastatic disease.  - History of severe arthritis, rheumatoid arthritis, severe neuropathy, primary hyperparathyroidism, Paget’s disease of the bone, or kidney stones.  - 25-OH vitamin D level > 30 mg/mL. | - New or worsening musculoskeletal pain unrelated to trauma. |
| Shapiro et al., 2016 | RCT/PG | Nutrition/suppl. | - Postmenopausal.  - Stage I-IIIB BrCA.  - Taking anastrozole, exemestane, or letrozole for at least 30 days preceding study entry. | - Previous AI treatment.  - History of rheumatoid arthritis, hypercalcemia, or renal disease.  - Unwilling to discontinue oral supplements containing vitamin D3, calcium, or both. | - BCPT-MS score > 1.5 regardless of temporal association after starting AI therapy. |
| Shenouda et al., 2022 | RCT/PG | Nutrition/suppl. | - Stage I-III ER(+) and/or PR(+) BrCA.  - Taking AI’s for a minimum of 4 weeks prior to study entry. | - Allergic to cherries.  - Uncontrolled diabetes mellitus.  - Pregnancy. | - Developed musculoskeletal pain felt by oncologist to be related to AI. |
| Sordi et al., 2019 | RCT/PG | Traditional | - Postmenopausal.  - HR(+) BrCA or carcinoma in situ.  - Undergoing adjuvant AI and/or chemoprophylaxis for 2 or more months. | - Other diseases that cause arthralgia such as rheumatoid arthritis, arthroses, fibromyalgia, or other arthralgia before using anastrozole.  - Pregnant or breastfeeding.  - Transplant patients.  - Anemia at time of recruitment. | - Moderate or severe arthralgia after initiating AI treatment, or arthralgia that worsened by >40%, or BPI score of at least 5. |
| Tsai et al., 2021 | RCT/PG | Physiol/psycho-physiol. | - Stage I-III BrCA.  - Currently taking AIs. | - Metastatic disease.  - Multiple non-breast cancer related pain sources, including visceral train and trauma pain.  - History of unstable mental disorder, neurocognitive disorder, or addictive disease.  - Pregnancy.  - Severe hearing or visual impairment.  - Inabilitiy to practice yoga due to severe limb edema, skin damage, orspinal disease.  - Having participated in yoga in the month preceding study entry.  - Routinely exercising > 90 min/week. | - History of AI-associated knee joint pain for at least 3 months preceding study entry. |
| Yeh et al., 2017 | Pre/post | Physiol/psycho-physiol. | - Postmenopausal.  - Nonmetastatic BrCA.  - Receiving AI’s for at least 2 months before study entry. | - Metastatic disease.  - Finished chemotherapy and/or radiation therapy <4 weeks prior to enrollment.  - Bone fracture or surgery on an affiliated extremity during the 6 months preceding study entry.  - Requiring corticosteroids or narcotics.  - Ear skin disease.  - Allergy to tape used for the study.  - Previous auricular therapy.  - Hospitalized for mental health reasons within the previous 3 months. | - Joint pain attributable to AI’s or had preexisting joint pain that worsened after the initiation of AI’s.  - Worst joint pain rated as 4 or more on a 0-10-point numeric rating scale in the previous week. |
| Zhang et al., 2018 | Pre/post | Traditional | - Postmenopausal.  - Nonmetastatic HR(+) BrCA.  - On AI’s. | - Taking agents influencing bone metabolism in preceding 3 months.  - Contraindications to calcium agents and vitamin D.  - Primary osteoarticular diseases.  - Other selected severe physical and mental health conditions. | - Ongoing musculoskeletal symptoms that started or worsened after initiating AI therapy, with persistence > 1 month.  - BPI-SR worst pain score > 3 over the 7 days preceding study entry and an Easter Cooperative Oncology Group performance status score of 0-2. |
| Key: AI = aromatase inhibitor; AIMSS = aromatase inhibitor-induced musculoskeletal syndrome; BPI = Brief Pain Inventory; BPI-SF = Brief Pain Inventory, Short Form; BrCA = breast cancer; COX-2 = cyclo-oxygenase-2; ER = estrogen receptor; FSH = follicle stimulating hormone; HAQ-II = Health Assessment Questionnaire-II; HR(+) = hormone receptor-positive; HgbA1c = glycosylated hemoglobin (hemoglobin A1c); LH = luteinizing hormone; PR = progesterone receptor.  a Report was published only in abstract form. b Refers to the original entry criteria for the original prospective study. In original trial, subjects were randomized to letrozole or exemestane. An amendment to the protocol allowed patients who were intolerant of their first AI to switch to the other study-provided AI. After a 2–8-week washout, patients started treatment on the second AI until discontinuation for any reason during follow-up. | | | | | |

**Supplemental Table 4. Inclusion/Exclusion Criteria and Definitions of AIMSS in the Included Studies of Rehabilitative Interventions**

| **Author [Ref.]** | **Study type** | **Intervention type** | **Inclusion criteria** | **Exclusion criteria** | **Definition of AIMSS** |
| --- | --- | --- | --- | --- | --- |
| Barbosa et al., 2021 | RCT/PG | Supervised sport or exercise | - History of BrCA  - On aromatase inhibitors | - Active cancer.  - Lymphedema present.  - Limitations to physical exercise. | - Complaints of arthralgia during AI therapy.  - Score of one point in the numerical rating scale (NRS) and one joint localized on the BPI). |
| Boing et al., 2023 | RCT-PG | Supervised sport or exercise | - Stage I-III BrCA  - Receiving hormone therapy | - “Significant physical or neurological limitations” | - Unspecified. |
| Cantarero-Villanueva et al., 2013a | RCT/PG | Supervised sport or exercise | - Stage I-IIIa breast cancer  - Currently receiving aromatase inhibitors or tamoxifen | - Metastatic disease.  - Joint pain due to inflammatory arthritis (e.g., rheumatoid arthritis, osteoarthritis, or gout).  - Onset of pain or non-inflammatory arthralgia prior to initiating hormone therapy. | - Bilateral, symmetrical joint pain (in hands, knees, hips, lower back, shoulders, and/or feet) attributable to hormone therapy.  - Score 3+ on an 11-point numerical rating scale in the preceding 2 weeks. |
| Cantarero-Villanueva et al., 2011 | RCT/PG | PT/OT/recreation therapy | - Stage I-III BrCA  - Finished neo-adjuvant therapy except for hormonal therapy.  - No active cancer | - Receiving chemotherapy or radiation therapy.  - Chronic or orthopedic disease that did not permit exercise participation.  - Uncontrolled hypertension. | - At least 4 symptoms including neck of shoulder pain, reduced physical capacity, fatigue, sleep problems, psychological disorder, or reduced physical-psychosocial functioning. |
| Conejo et al., 2018 | RCT/PG | Other | - Stage I-IIIA BrCA  - Treated with AI’s  - Completed primary carcinoma treatment, including surgery, chemotherapy, and radiotherapy | - Unspecified. | - Diagnosed musculoskeletal disorder attributable to AI’s. |
| Crespo-Bosque et al., 2016a | RCT/PG | Supervised sport or exercise | - Postmenopausal  - Diagnosis of BrCA  - Treated with AI’s for at least 6 months | - Pre-existing rheumatological conditions. | - Arthralgias associated with AI treatment. |
| De Sire et al., 2021 | RCT/PG | Supervised sport or exercise | - Diagnosed HR(+) BrCA | - Metastatic breast cancer.  - Receiving concurrent chemotherapy  - Cognitive impairment.  - Bone fractures in the past 6 months  - Presence of a pacemaker and/or electrical implantable device.  - Absolute contraindications to physical activity. | - AIMSS onset during AI therapy, diagnosed clinically at screening. |
| DeNysschen et al., 2014 | Pre/post | Supervised sport or exercise | - Postmenopausal  - ER(+) BrCA  - Taking an AI for at least 1 month | - Orthopedic or neuromuscular disorders precluding participation in exercise.  - History of rheumatoid arthritis, cardiac disease, or morbid obesity.  - Already exceeding minimal physical activity recommendations.  - Taking chronic anti-inflammatory or other pain medications. | - Self-reported mild to moderate arthralgias. |
| Fields et al., 2016 | RCT/PG | Supervised sport or exercise | - Women with history of BrCA.  - On endocrine therapy and reporting joint symptoms at routine follow-up over the preceding 12 months. | - Metastatic disease.  Already undertaking Nordic walking.  - Inability to exercise due to mobility issues. | - Reported joint symptoms at routine follow-up while taking endocrine therapy. |
| Irwin et al., 2015 & Baglia et al., 2019 | RCT/PG | Supervised sport or exercise | - Postmenopausal.  - Stage I-III HR(+) BrCA.  - Receiving AI for at least 6 months. | - Unspecified. | - Experiencing arthralgia for at least 2 months rated >3 on BPI worst pain item.  - Arthralgia started after initiation of an AI or was exacerbated by AI use in cases of preexisting joint pain. |
| Lippi et al., 2022 | RCT/PG | PT/OT/recreation therapy | - Adult women undergoing AI treatment for BrCA | - Unspecified. | - Mentions only “suffering from AIMSS.” |
| Nyrop et al., 2017 | RCT/PG | Supervised sport or exercise | - Women with BrCA.  - Adherent to AI’s for at least 4 weeks preceding study entry.  - Exercising <150 minutes/week. | - Unspecified. | - Score of at least 3 on 5-point scale inquiring about joint pain, stiffness, or achiness intensity “at its worst” in the past 7 days. |
| Nyrop et al., 2014 | Pre/post | Supervised sport or exercise | - Stage I-III BrCA  - Currently on AI therapy. | - Medical condition(s) limiting participation in walking intervention.  - Already walking 5 days/week for at least 30 minutes/session. | - Self-diagnosed arthritis or joint pain or stiffness. |
| Tajaesu et al., 2018 | Pre/post | Supervised sport or exercise | - BrCA diagnosis.  - Receiving AI’s for 0-4 years. | - Metastatic disease. | - Any arthralgia level. |
| Tamaki et al., 2018a | RCT/PG | Supervised sport or exercise | - Diagnosed BrCA. | - Unspecified. | - BrCA patients with “AI induced arthralgia.” |
| Varadarajan et al., 2016a | RCT/PG | Supervised sport or exercise | - HR(+) BrCA.  - On adjuvant AI. | - Metastatic disease.  - Pre-existing rheumatoid arthritis or fibromyalgia. | - Experiencing significant joint discomfort or stiffness when attempting ADLs which began or significantly increased after initiation of AI therapy. |
| Key: AI = aromatase inhibitor; AIMSS = aromatase inhibitor-induced musculoskeletal syndrome; BPI = Brief Pain Inventory; BPI-SF = Brief Pain Inventory, Short Form; BrCA = breast cancer; COX-2 = cyclo-oxygenase-2; ER = estrogen receptor; FSH = follicle stimulating hormone; HAQ-II = Health Assessment Questionnaire-II; HR(+) = hormone receptor-positive; HgbA1c = glycosylated hemoglobin (hemoglobin A1c); LH = luteinizing hormone; PR = progesterone receptor  a Report was published only in abstract form. b Refers to the original entry criteria for the original prospective study. In original trial, subjects were randomized to letrozole or exemestane. An amendment to the protocol allowed patients who were intolerant of their first AI to switch to the other study-provided AI. After a 2–8-week washout, patients started treatment on the second AI until discontinuation for any reason during follow-up. | | | | | |
